# Supplementary material for: Effect of Voriconazole on Tacrolimus Blood Concentration in Renal Transplant Recipients after Voriconazole Discontinuation
Source: Hindawi journal article supplement (doi:10.1155/2024/2870048), 2024-01-01
Supplement: f1 [file 2870048.f1.docx]

***Supplementary Figures***

**Fig. S1**


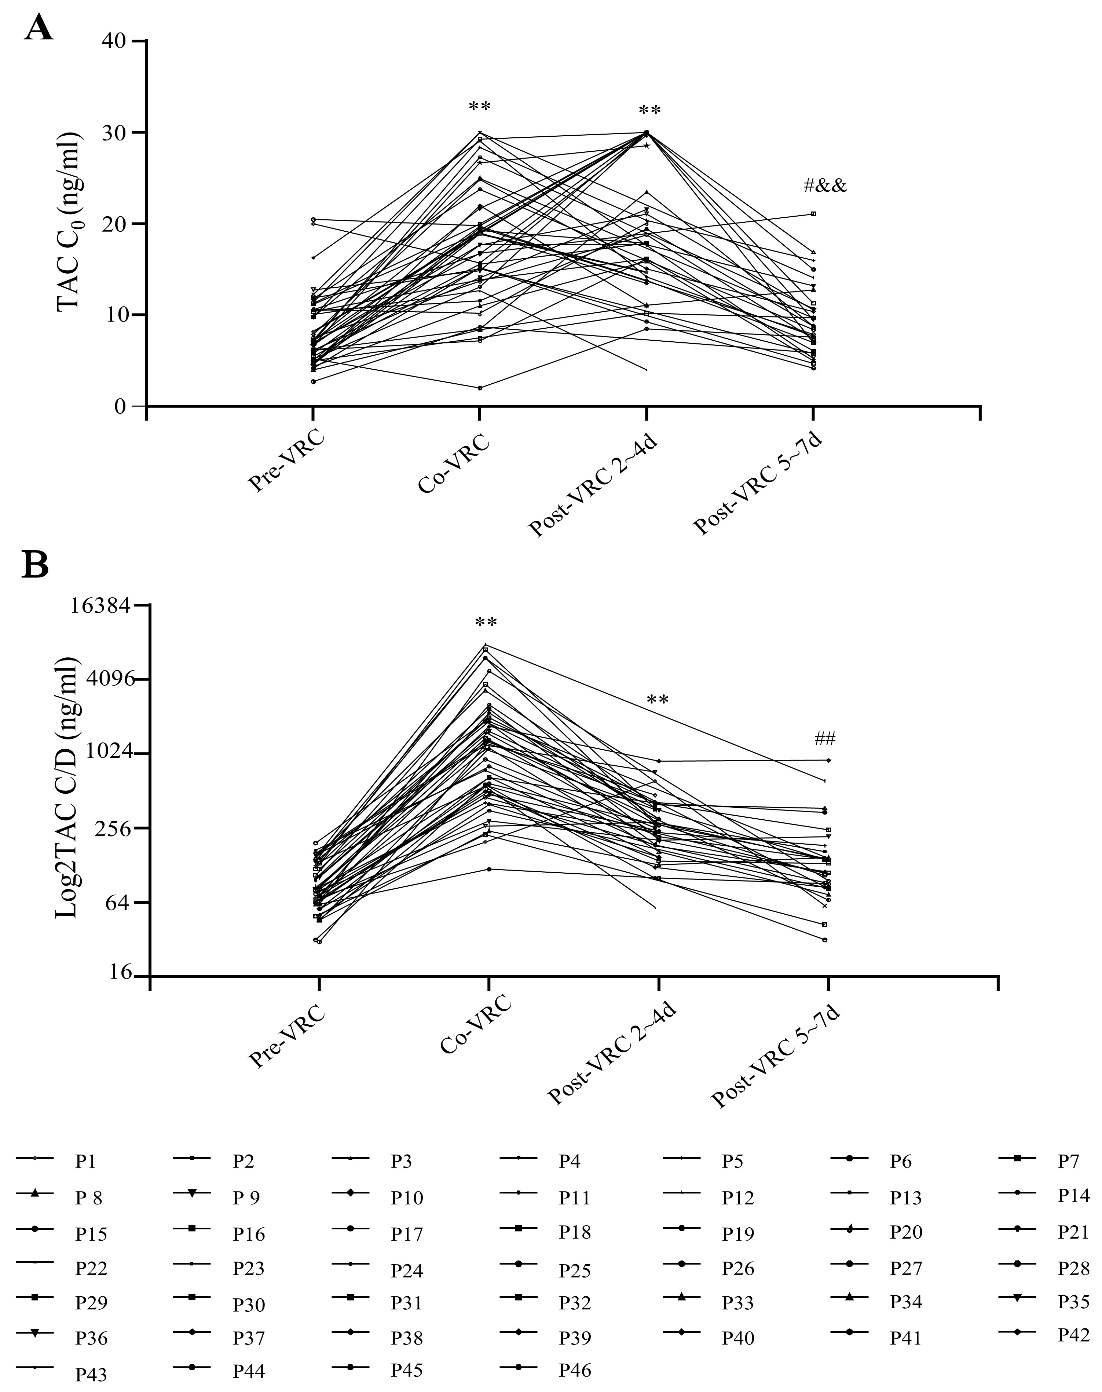


**Fig. S1** Comparison of TAC C0 **(A)** and C/D **(B)** between multiple groups before and after concomitant VRC treatment using paired analysis, *P***< 0.01 compared with the Pre-VRC treatment, *P*# < 0.05 or *P*## < 0.01 compared with the Co-VRC treatment, and *P*&& < 0.01 compared with the Post-VRC 2-4d. Note: the vertical axis of Fig. S1B is taken as log2 logarithm.

**Fig. S2**


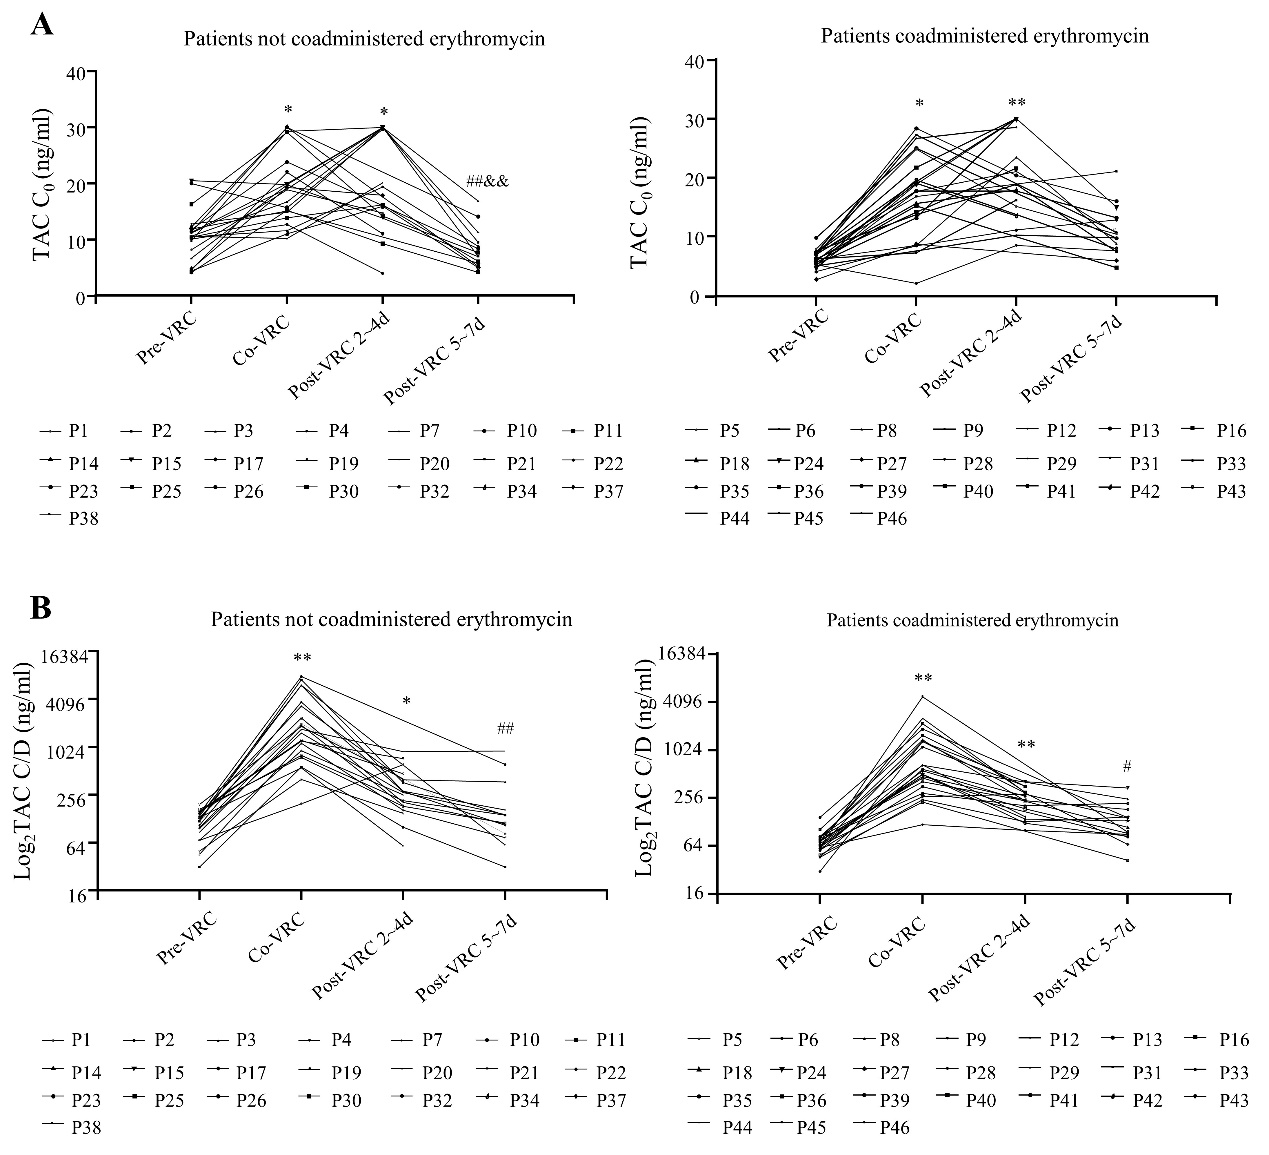


**Fig. S2** Multiple group comparisons to evaluate the impact of co-administration of erythromycin on TAC C0 **(A)** and C/D **(B)** before and after concomitant VRC treatment using paired analysis, *P**< 0.05 or *P***< 0.01 compared with the Pre-VRC treatment, *P*# < 0.05 or *P*## < 0.01 compared with the Co-VRC treatment, and *P*&& < 0.01 compared with the Post-VRC 2-4d. Note: the vertical axis of Fig. S2B is taken as log2 logarithm.
